2. Apfelbaum JL, Rupp SM, Tung A, Connis RT, Domino KB, Grant MD, Mark JB: Practice guidelines for central venous access 2020: An updated report by the American Society of Anesthesiologists Task Force on Central Venous Access. *ANESTHESIOLOGY* 2020; 132:8–43

(Accepted for publication April 14, 2020. Published online first on May 12, 2020.)

## Perioperative Neurocognitive Disorder: Comment

To the Editor:

We read with great interest the review article by Eckenhoff *et al.* on the different approaches used in preclinical perioperative neurocognitive disorder research.<sup>1</sup> In this review, the authors provided data on the various preclinical models used in scientific literature to study perioperative neurocognitive disorder that include molecular, cell culture, brain slices, and animal models. Surprisingly, the possible role of mechanical ventilation as cause of perioperative neurocognitive disorder is not mentioned.

There is growing preclinical and clinical evidence on the relevance of mechanical ventilation–induced neurocognitive damage.<sup>2–5</sup> Various mechanisms have been described to explain how mechanical ventilation–induced alveolar stretching might trigger neuroinflammation: local brain action of systemic lung–derived inflammatory cytokines, afferent neuronal signaling by vagal-mediated dopaminergic lung–brain axis, and histopathologic changes in blood–brain barrier and brain deposition of  $\beta$ -amyloid.<sup>2</sup> These are also known as “brain–lung” cross-talk.<sup>2</sup> Despite the ample preclinical evidence on mechanical ventilation–induced neurocognitive damage, there are no clinical studies designed to evaluate the effect of mechanical ventilation on neuroinflammation and perioperative neurocognitive disorder, but there is evidence that mechanical ventilation duration is a risk factor for neurocognitive impairment in critically ill patients and that, in neurocritical care patients, mechanical ventilation setting is associated with functional outcome.<sup>3,4</sup> Furthermore, a retrospective study in patients resuscitated after out-of-hospital cardiac arrest proved that lower tidal volume associates with better neurocognitive outcome.<sup>5</sup>

We wonder if, considering this evidence, Eckenhoff *et al.* agree that mechanical ventilation–related neuroinflammation

might ultimately contribute to perioperative neurocognitive disorder and therefore deserves to be addressed in appropriately designed preclinical and clinical studies.

### Competing Interests

The authors declare no competing interests.

Giovanni Giordano, M.D., Francesco Pugliese, Ph.D., Federico Bilotta, Ph.D. Sapienza Università di Roma, Roma, Italy (G.G.).  
giordano.gj@gmail.com

DOI: 10.1097/ALN.0000000000003362

### References

1. Eckenhoff RG, Maze M, Xie Z, Culley DJ, Goodlin SJ, Zuo Z, Wei H, Whittington RA, Terrando N, Orser BA, Eckenhoff MF: Perioperative neurocognitive disorder: State of the preclinical science. *ANESTHESIOLOGY* 2020; 132:55–68
2. Bilotta F, Giordano G, Sergi PG, Pugliese F: Harmful effects of mechanical ventilation on neurocognitive functions. *Crit Care* 2019; 23:273
3. Sakusic A, O'Horo JC, Dziadzko M, Volha D, Ali R, Singh TD, Kashyap R, Farrell AM, Fryer JD, Petersen R, Gajic O, Rabinstein AA: Potentially modifiable risk factors for long-term cognitive impairment after critical illness: A systematic review. *Mayo Clin Proc* 2018; 93:68–82
4. Borsellino B, Schultz MJ, Gama de Abreu M, Robba C, Bilotta F: Mechanical ventilation in neurocritical care patients: A systematic literature review. *Expert Rev Respir Med* 2016; 10:1123–32
5. Beitler JR, Ghafouri TB, Jinadasa SP, Mueller A, Hsu L, Anderson RJ, Joshua J, Tyagi S, Malhotra A, Sell RE, Talmor D: Favorable neurocognitive outcome with low tidal volume ventilation after cardiac arrest. *Am J Respir Crit Care Med* 2017; 195:1198–206

(Accepted for publication April 17, 2020. Published online first on May 20, 2020.)

## Perioperative Neurocognitive Disorder: Reply

In Reply:

We thank Giordano *et al.*<sup>1</sup> for their interest in our review<sup>2</sup> and perioperative neurocognitive disorder in general.

The role of mechanical ventilation *per se* in perioperative neurocognitive disorder, while feasible, is uncertain, as it is difficult to isolate from the many other features of the perioperative period, such as surgery, anesthesia, or extended critical care. In the specific case of our review, there are few if any reports of mechanical ventilation in preclinical models; thus, we regret that we cannot comment further on the role at this time.

### Competing Interests

The authors receive funding from an unrelated National Institutes of Health grant (Bethesda, Maryland; grant No. R01GM135633) and declare no competing interests.

Roderic G. Eckenhoff, M.D., Maryellen F. Eckenhoff, Ph.D.  
University of Pennsylvania Perelman School of Medicine,  
Philadelphia, Pennsylvania (R.G.E.). roderic.eckenhoff@  
pennmedicine.upenn.edu

DOI: 10.1097/ALN.0000000000003363

### References

1. Giordano G, Pugliese F, Bilotta F: Perioperative neurocognitive disorder: Comment. *ANESTHESIOLOGY* 2020; 133:243
2. Eckenhoff RG, Maze M, Xie Z, Culley DJ, Goodlin SJ, Zuo Z, Wei H, Whittington RA, Terrando N, Orser BA, Eckenhoff MF: Perioperative neurocognitive disorder: State of the preclinical science. *ANESTHESIOLOGY* 2020; 132:55–68

(Accepted for publication April 17, 2020. Published online first on May 20, 2020.)

## Setup of a Dedicated Coronavirus Intensive Care Unit

### Logistical Aspects

#### To the Editor:

Northern Italy is facing a 2019 coronavirus disease (COVID-19) outbreak<sup>1,2</sup>; patients are mainly minimally symptomatic but may develop acute respiratory failure requiring admission to the intensive care unit (ICU).<sup>3</sup>

Logistics are fundamental for the safety of both healthcare professionals and ICU patients, and to limit the spread of this highly infective disease.

Once alerted to the first coronavirus case requiring admission to ICU, a section of our unit was emptied and reorganized in 2 h (fig. 1). Access to the unit was limited to the minimal number of healthcare providers and mandatory through a double filter. A “clean filter” for donning is equipped with disposable personal protective equipment (gowns, filter face respirators, visors, hair covers, gloves, boot covers<sup>4</sup>), mirror, chairs, scrubs, waste management material, and hand disinfectants. A “contaminated filter” for doffing is equipped with waste management material, mirror, bathroom to wash before exiting, and hand disinfectants.

For each patient, complete monitoring (blood pressure, oxygen saturation measured by pulse oximetry, end-tidal carbon dioxide, heart rate, respiratory rate, and temperature) is available and duplicated in the “control unit,” a clean area separated by a glass wall allowing direct visualization of the patients.

A dedicated aspiration system connects the expiratory valve to wall gas aspiration; this system is also available for a helmet, which is preferred to masks for continuous positive airway pressure/noninvasive ventilation to limit the droplets’ spread.<sup>5</sup>

A “laboratory section” includes a dedicated ultrasound machine (images are shared through a Picture Archiving and Communication System’s connection available in the unit); disposable fiberbronchoscopes and video-laryngoscopes (fiberbronchoscopy is limited to urgent indications, in order to limit airways opening); point-of-care arterial blood gas and coagulation analyses; transport ventilator; and emergency cart with defibrillator.

The main door of the unit is opened only for the patient’s admittance and once per day for garbage evacuation, performed by fully protected professionals and followed by cleaning with sodium hypochlorite 0.1 to 0.5%.

The communication between coronavirus and control units is fundamental both for clinical management and nursing; it is facilitated by an intercom and a dedicated smartphone. All the therapy is prepared outside the coronavirus unit in order to limit the time spent in it, which is physically demanding due to limited transpiration and rebreathing. All the consumable and products needed in the coronavirus unit are provided by nurses and physicians working in the control unit and dropped off in the contaminated filter, where nurses and physicians working inside the coronavirus unit can retrieve them.

A similar smaller and separated structure (buffer zone) admits patients with suspected COVID-19 infection while waiting for results. If positive, the patient is admitted to the coronavirus unit; if negative, to the general intensive care unit.

A dedicated gurney equipped with a StarMed Ventukit helmet (Intersurgical, Italy), two oxygen bottles, bag-mask, monitor, and emergency bag for intubation and chest drain positioning is available for emergency calls in the wards for positive/suspected patients; the intensivist mandatorily wears full protection equipment before leaving the unit.
